# Supplementary material for: Low-cost solution-processed copper iodide as an alternative to PEDOT:PSS hole transport layer for efficient and stable inverted planar heterojunction perovskite solar cells
Source: Royal Society of Chemistry journal article supplement (doi:10.1039/c5ta05286f), 2015-01-01
Supplement: c5ta05286f1.pdf [file c5ta05286f1.pdf]

# Electronic Supplementary Information

## Low-cost solution-processed copper iodide as an alternative to PEDOT: PSS hole transport layer for efficient and stable inverted planar heterojunction perovskite solar cells

Wei-Yi Chen,<sup>a</sup> Lin-Long Deng,<sup>\*a</sup> Si-Min Dai,<sup>b</sup> Xin Wang,<sup>a</sup> Cheng-Bo Tian,<sup>b</sup>  
Xin-Xing Zhan,<sup>b</sup> Su-Yuan Xie,<sup>\*b</sup> Rong-Bin Huang<sup>b</sup> and Lan-Sun Zheng<sup>b</sup>

<sup>a</sup>*Pen-Tung Sah Institute of Micro-Nano Science and Technology, Xiamen University, Xiamen 361005, China.*

*E-mail: denglinlong@xmu.edu.cn*

<sup>b</sup>*State Key Lab for Physical Chemistry of Solid Surfaces, iChEM (Collaborative Innovation Center of Chemistry for Energy Materials), Department of Chemistry, College of Chemistry and Chemical Engineering, Xiamen*

*University, Xiamen 361005, China. E-mail: syxie@xmu.edu.cn*

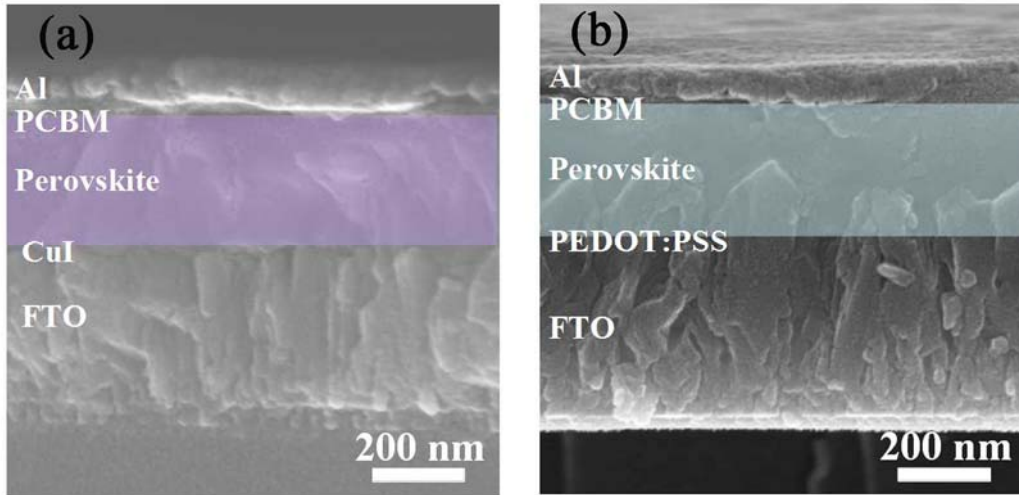

**Fig. S1** Cross-sectional SEM images of the optimized device configuration with CuI (a), and PEDOT: PSS (b) as HTL.

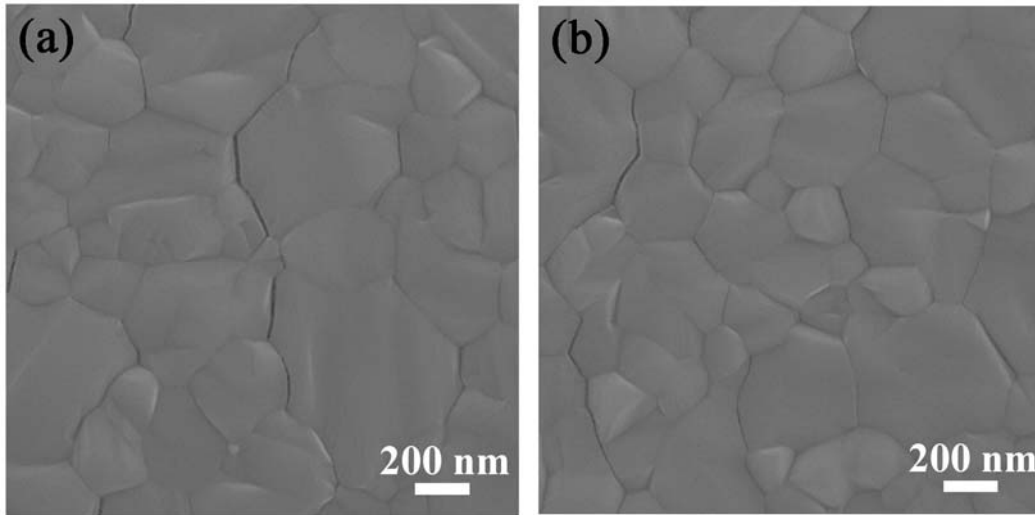

**Fig. S2** SEM images of FTO/CuI/perovskite (a), and FTO/PEDOT: PSS/perovskite (b).

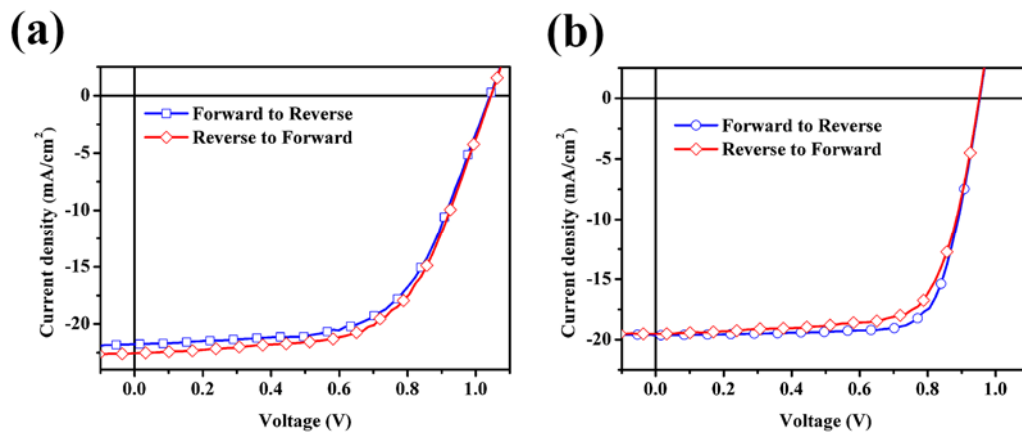

**Fig. S3** *J-V* curves of the inverted PHJ perovskite solar cells based on CuI (a), and PEDOT: PSS (b) with respect to forward and reverse scan directions.
